# Supplementary material
Source: MDPI journal article supplement (https://www.mdpi.com/2076-3417/11/6/2820)
Supplement: s1 [file s1]

# Supplementary Materials: Decomposition Factor Analysis Based on Virtual Experiments throughout Bayesian Optimization for Compost-Degradable Polymers

Ryo Yamawaki, Akiyo Tei, Kengo Ito and Jun Kikuchi

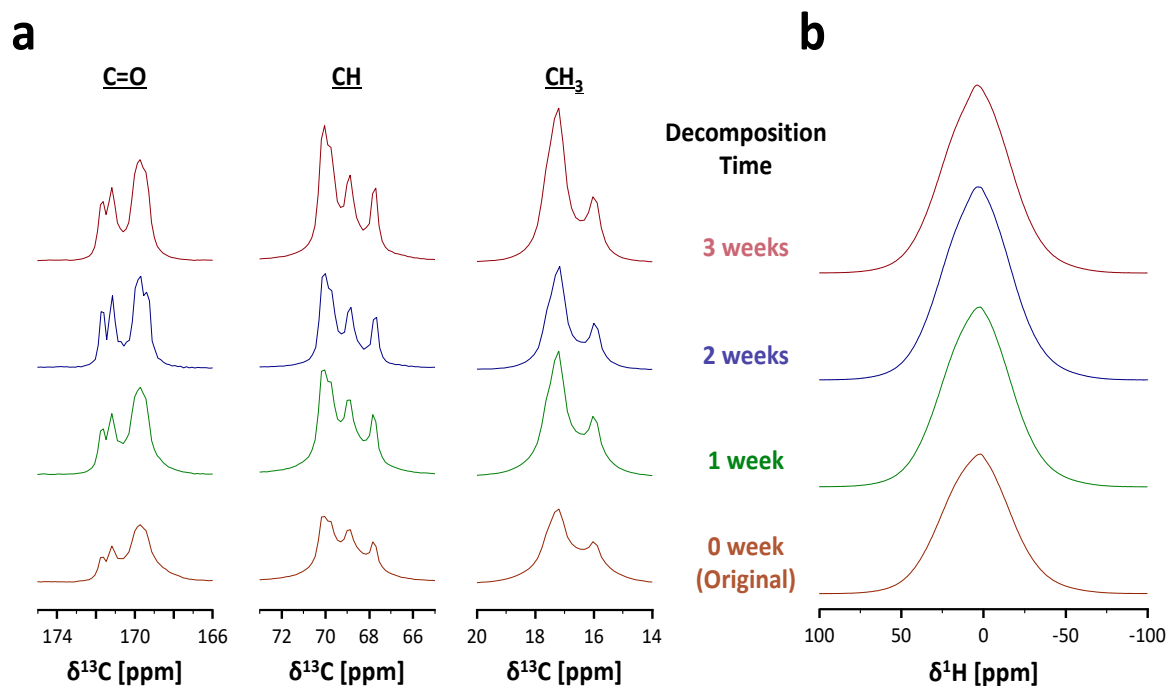

**Figure 1.** Stacked plot of (a) cross-polarization and magic angle spinning ( $^{13}\text{C}$ -CP/MAS) spectra and (b)  $^1\text{H}$  wide-line nuclear magnetic resonance (NMR) spectra of sample S/A during the compost-degradation experiments. (a) also shows the carbonyl group (C=O), methine group (CH), and methyl group (CH<sub>3</sub>).

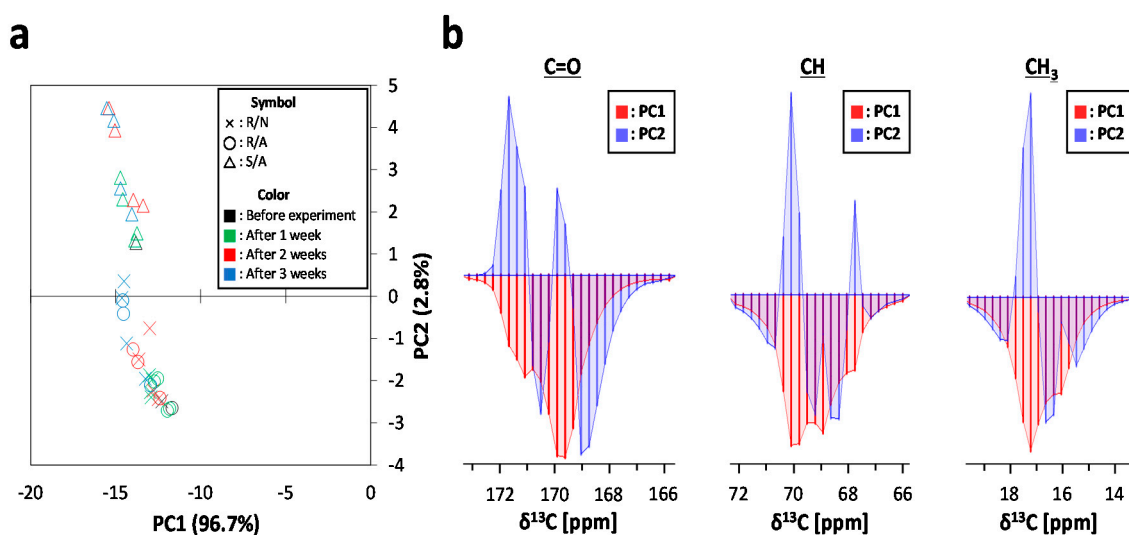

**Figure S2.** Principal component analysis (PCA) using the <sup>13</sup>C-CP/MAS spectra of polylactic acid (PLA). (a) PCA scores, symbolized by sample name and colored by each decomposition period. (b) PCA loadings, colored red for PC1 and blue for PC2. (b) also shows the carbonyl group (C=O), methine group (CH), and methyl group (CH<sub>3</sub>). Details of samples are listed in Table S1.

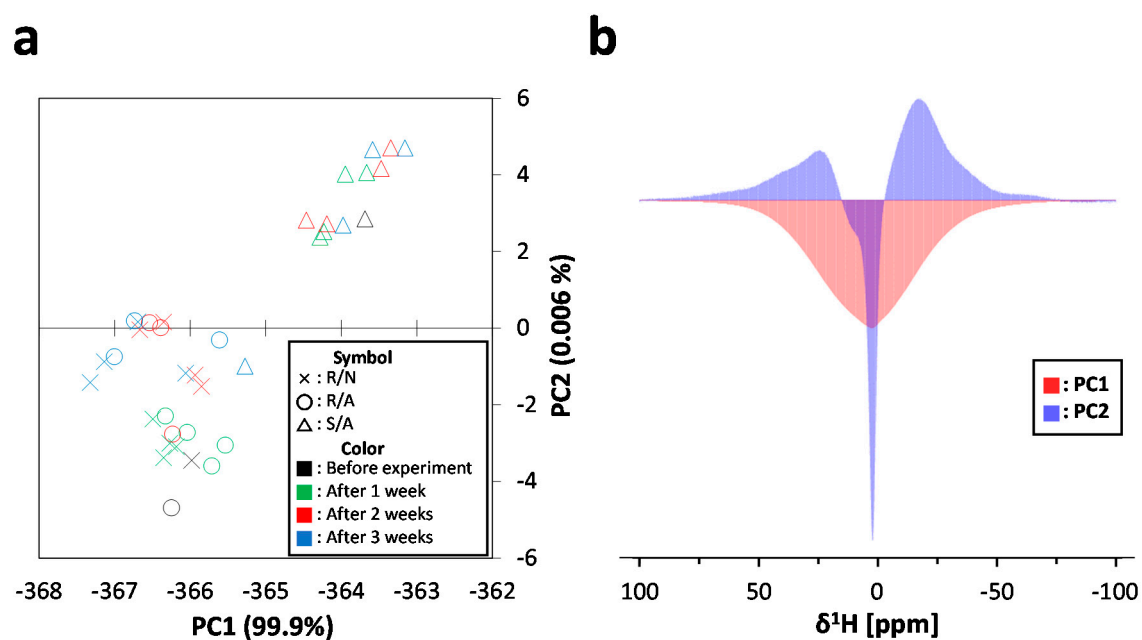

**Figure S3.** PCA using the <sup>1</sup>H wide-line NMR spectra of PLA. (a) PCA scores, symbolized by sample name and colored by decomposition period. (b) PCA loadings, colored red for PC1 and blue for PC2. Details of samples are listed in Table S1.

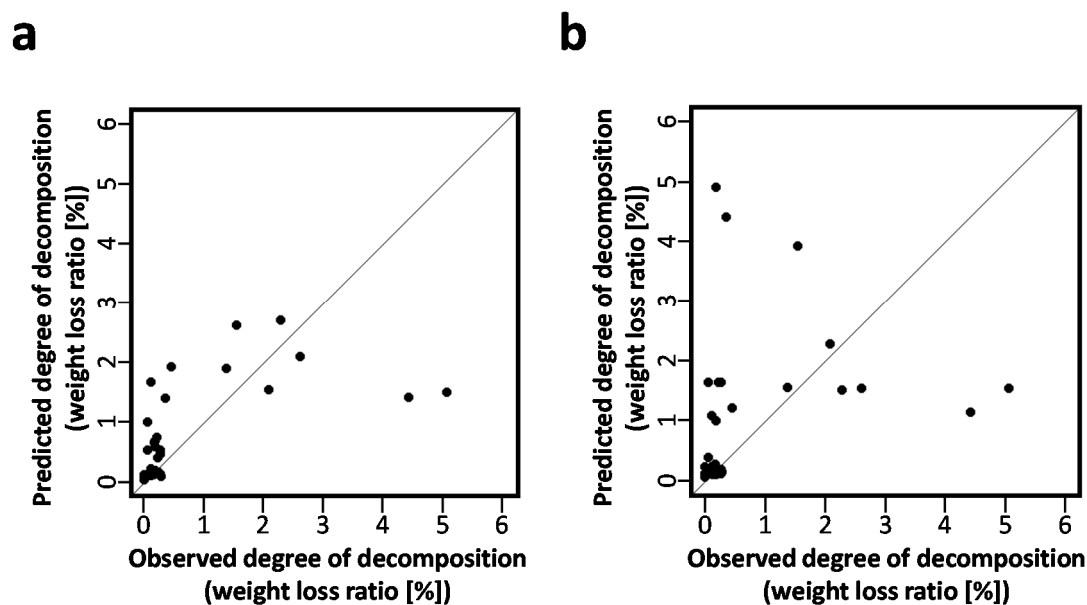

**Figure S4.** The results of predictive modeling of the degree of decomposition using weight-loss ratio, analytical values, experimental conditions, and PCA scores of  $^{13}\text{C}$ -CP/MAS spectra. (a) A bivariate plot of the observed and predicted weight-loss ratio of validation data. The predictive model was constructed by random forest (RF) machine learning. The coefficient of determination ( $R^2$ ) is 0.38 and root mean square error (RMSE) is 0.76%. (b) A bivariate plot of the observed and predicted weight-loss ratio of the validation data. The predictive model was constructed using XGBoost machine learning algorithm.  $R^2$  is 0.08 and RMSE is 1.30%.

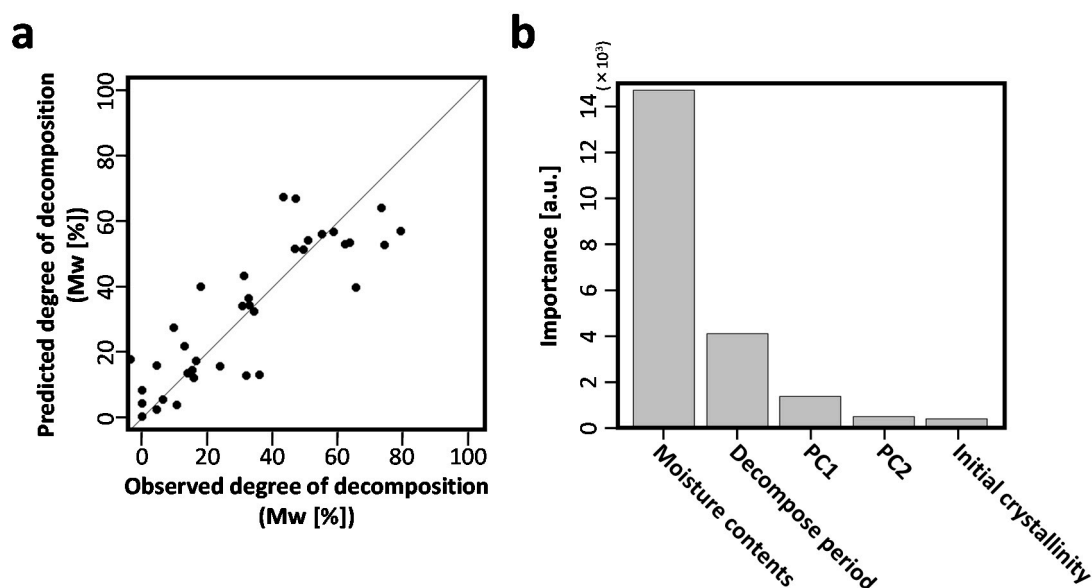

**Figure S5.** The results of predictive modeling of the degree of decomposition using weight average molecular weight (Mw), analytical values, experimental conditions, and PCA scores of  $^1\text{H}$  wide-line NMR spectra by RF machine learning. (a) A bivariate plot of the observed and predicted Mw of validation data.  $R^2$  is 0.73 and RMSE is 12.42%. (b) Bar chart of importance in the decomposition degree predictive model. Details of PC1 and PC2 scores used for machine learning are shown in Figure S3.

**Table 1.** List of PLA samples molded by the press-molding machine.

| Sample name* | Cooling condition after pressing     | Anneal treatment |            | Initial crystallinity |
|--------------|--------------------------------------|------------------|------------|-----------------------|
|              |                                      | Temperature      | Time       |                       |
| R/N          | At room temperature                  | —                | —          | 3.3%                  |
| R/A          | At room temperature                  | 110°C            | 15 minutes | 25.4%                 |
| S/A          | To stand still after stopping heater | 110°C            | 56 hours   | 46.1%                 |

\* R, rapid cool; S, slow cool; N, non-annealed; A, annealed
